# Supplementary material for: Site-Specific Evolutionary Rate Shifts in HIV-1 and SIV
Source: MDPI journal article supplement (doi:10.3390/v12111312), 2020-11-16
Supplement: s1 [file s1]

## Supplementary Material

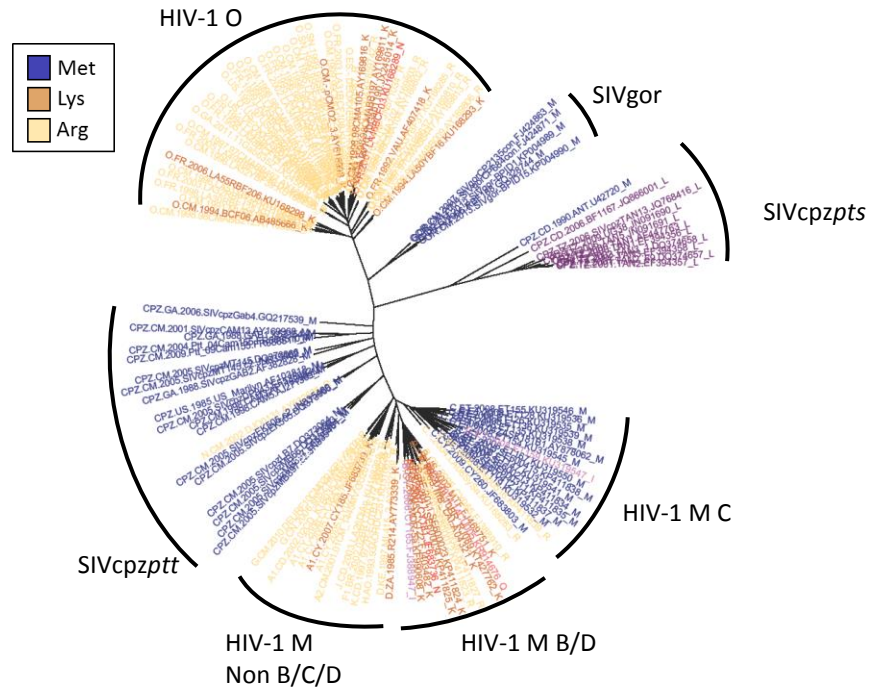

**Fig. S1.** Residues distribution for Gag<sub>30</sub> along the HIV-1/SIV phylogeny. This position exhibits a pattern more similar to "content shift" than to "rate shift".

**Table S1.** Maximum log-likelihood (LL) values for the analysis of the nine HIV-1/SIVcpz/SIVgor proteins under the rate shift and null models.

| Protein | Rate Shift Model LL | Null Model LL | 2ΔLL | P-value ( $\chi^2_3$ ) |
|---------|---------------------|---------------|------|------------------------|
| Gag     | -29,478.3           | -29,671.4     | 386  | <10 <sup>-50</sup>     |
| Pol     | -40,813.1           | -41,097.2     | 568  | <10 <sup>-100</sup>    |
| Vif     | -12,677.6           | -12,756.3     | 157  | <10 <sup>-30</sup>     |
| Vpr     | -5,328.1            | -5,355.76     | 55   | <10 <sup>-10</sup>     |
| Tat     | -8,918.23           | -8,947.61     | 59   | <10 <sup>-10</sup>     |
| Rev     | -12,662             | -12,733.6     | 143  | <10 <sup>-30</sup>     |
| Vpu     | -10,548.7           | -10,664.1     | 231  | <10 <sup>-50</sup>     |
| Env     | -92,347.6           | -93,028.8     | 1362 | <10 <sup>-100</sup>    |
| Nef     | -15,611.4           | -15,804.1     | 385  | <10 <sup>-50</sup>     |

**Table S2.** Rate shifts as *percentage from total rate shifts for prominent branches*, for rate decelerating sites (upper) and rate accelerating sites (lower), colored by intensity. Data presented in this table is not normalized by protein length.

|                   |            |            |            |            |            |            |            |            |            |
|-------------------|------------|------------|------------|------------|------------|------------|------------|------------|------------|
| DEC               |            |            |            |            |            |            |            |            |            |
| Branch/protein    | <b>Env</b> | <b>Gag</b> | <b>Pol</b> | <b>Rev</b> | <b>Tat</b> | <b>Nef</b> | <b>Vif</b> | <b>Vpr</b> | <b>Vpu</b> |
| <b>Group M</b>    | 39%        | 21%        | 21%        | 4%         | 0%         | 0%         | 0%         | 0%         | 14%        |
| <b>Group O</b>    | 43%        | 11%        | 11%        | 20%        | 0%         | 4%         | 2%         | 2%         | 7%         |
| <b>SIVgor+P+O</b> | 21%        | 7%         | 29%        | 0%         | 0%         | 29%        | 14%        | 0%         | 0%         |
| <b>SIVcpzpts</b>  | 26%        | 15%        | 7%         | 0%         | 0%         | 22%        | 11%        | 4%         | 15%        |
| ACC               |            |            |            |            |            |            |            |            |            |
| Branch/protein    | <b>Env</b> | <b>Gag</b> | <b>Pol</b> | <b>Rev</b> | <b>Tat</b> | <b>Nef</b> | <b>Vif</b> | <b>Vpr</b> | <b>Vpu</b> |
| <b>Group M</b>    | 43%        | 22%        | 4%         | 0%         | 4%         | 13%        | 4%         | 4%         | 4%         |
| <b>Group O</b>    | 55%        | 18%        | 12%        | 6%         | 0%         | 4%         | 4%         | 0%         | 2%         |
| <b>SIVgor+P+O</b> | 40%        | 0%         | 0%         | 0%         | 0%         | 40%        | 0%         | 10%        | 10%        |
| <b>SIVcpzpts</b>  | 35%        | 10%        | 10%        | 0%         | 0%         | 23%        | 3%         | 6%         | 13%        |

**Table S3.** Rate deceleration events that may be related to previously reported species-specific adaptation events.

| Protein    | Clade            | Adapting sites | Potential adaptation | Functional domain near adaptive sites                        | Supporting literature                                                      | Description                                                                                                                                                                                                    |
|------------|------------------|----------------|----------------------|--------------------------------------------------------------|----------------------------------------------------------------------------|----------------------------------------------------------------------------------------------------------------------------------------------------------------------------------------------------------------|
| <b>Nef</b> | SIVcpzptt        | 157            | Anti-tetherin        | 163, 169                                                     | (Gotz et al. 2012)                                                         | HIV-1 adapted to chimpanzee reverted Nef <sub>163</sub> and Nef <sub>169</sub> positions to regain anti-tetherin activity                                                                                      |
| <b>Nef</b> | HIV-1 O + SIVgor | 177            | Anti-tetherin        | 165-173 (C-loop)                                             | (Mack 2017)                                                                | O-Nef counteracts tetherin using its C-loop                                                                                                                                                                    |
| <b>Vif</b> | HIV-1 O + SIVgor | 73, 167        | Anti-A3G             | 69-72 (A3G binding domain), 161-169 (Oligomerization domain) | (Pery et al. 2009; Letko et al. 2013; Feng et al. 2014; Letko et al. 2015) | Gorilla-A3G differs from human-A3G in the Vif-recognized domain                                                                                                                                                |
| <b>Vif</b> | HIV-1 O          | 127            | Anti-A3G             | 120-124 (Cullin5 interacting domain)                         | (Feng et al. 2014)                                                         | Gorilla-A3G differs from human-A3G in the Vif-recognized domain.                                                                                                                                               |
| <b>Gag</b> | HIV-1 M          | 30             | Unknown              | 30                                                           | (Wain et al. 2007)                                                         | This site is accepted as an adaptation marker to human of HIV-1 groups M and O. Our analysis identified a rate deceleration but inconclusive for which clade rate deceleration happened (Supplementary Fig. 2) |

A3G=APOBEC3G;

**File S1.**

Phylogenetic tree and sequence alignments used for identifying rate shifting sites. The zip file contains all nine alignments and constructed phylogeny used for identifying rate shifting sites.

**File S2.**

HIV/SIV sites identified as rate shifting. Positions are provided in HXB2 reference sequence coordinates. Branch number field refer to the branch number outputted by RASER (Penn et al. 2008); for ease of reading we provide branch labels for most branches.

**File S3.**

HIV/SIV sites identified as rate shifting when group M contains many more sequenced than group O. Positions are provided in HXB2 reference sequence coordinates. Branch number field refer to the branch number outputted by RASER (Penn et al. 2008); for ease of reading we provide branch labels for most branches.

## References

- Feng Y, Baig TT, Love RP and Chelico L (2014). "Suppression of APOBEC3-mediated restriction of HIV-1 by Vif." *Front Microbiol* 5: 450.
- Gotz N et al. (2012). "Reacquisition of Nef-Mediated Tetherin Antagonism in a Single In Vivo Passage of HIV-1 through Its Original Chimpanzee Host." *Cell Host & Microbe* 12(3): 373-380.
- Letko M et al. (2015). "Identification of the HIV-1 Vif and Human APOBEC3G Protein Interface." *Cell Rep* 13(9): 1789-1799.
- Letko M et al. (2013). "Vif Proteins from Diverse Primate Lentiviral Lineages Use the Same Binding Site in APOBEC3G." *Journal of Virology* 87(21): 11861-11871.
- Mack K (2017). Counteraction of the antiviral factor tetherin by HIV-1 group O, Universität Ulm.
- Penn O et al. (2008). "Evolutionary modeling of rate shifts reveals specificity determinants in HIV-1 subtypes." *PLoS Comput Biol* 4(11): e1000214.
- Pery E, Rajendran KS, Brazier AJ and Gabuzda D (2009). "Regulation of APOBEC3 proteins by a novel YXXL motif in human immunodeficiency virus type 1 Vif and simian immunodeficiency virus SIVagm Vif." *J. Virol.* 83(5): 2374-2381.
- Wain LV et al. (2007). "Adaptation of HIV-1 to its human host." *Mol. Biol. Evol.* 24(8): 1853-1860.
