# Supplementary material for: Site-Specific Evolutionary Rate Shifts in HIV-1 and SIV
Source: Viruses. 2020 Nov 16;12(11):1312. doi: 10.3390/v12111312 (PMC7696578; doi:10.3390/v12111312)
Supplement: Supplementary file 1 [file viruses-12-01312-s001.zip]

Archive with 4 entries (4 files):
- File S1.zip
- File S2.csv
- File S3.csv
- Supplementary information.pdf
