# Supplementary material for: Site-Specific Evolutionary Rate Shifts in HIV-1 and SIV
Source: Viruses. 2020 Nov 16;12(11):1312. doi: 10.3390/v12111312 (PMC7696578; doi:10.3390/v12111312)
Supplement: Supplementary file 1 [file viruses-12-01312-s001.zip › File S2.csv]

protein	position	branch	probAcc	probDec	probAll	branch label	rateshift type
gag	42	139	0.7167	0.002	0.7188	Group O	ACC
gag	54	53	0.0003	0.7872	0.7875	SubtypesB+D	DEC
gag	58	138	0.0068	0.512	0.5188	SIVgor+P+O	DEC
gag	59	139	0.6841	0.003	0.6871	Group O	ACC
gag	62	139	0.0011	0.7179	0.719	Group O	DEC
gag	67	15	0.6126	0.0057	0.6183	Group M	ACC
gag	102	8	0.5801	0.0208	0.6008	(notCPZpts)	ACC
gag	105	15	0.0027	0.6164	0.6191	Group M	DEC
gag	107	8	0.593	0.0088	0.6017	(notCPZpts)	ACC
gag	107	53	0.0007	0.5326	0.5333	SubtypesB+D	DEC
gag	116	15	0.0007	0.8444	0.8451	Group M	DEC
gag	119	8	0.5053	0.0151	0.5204	(notCPZpts)	ACC
gag	134	14	0.0036	0.5633	0.567	Pre M	DEC
gag	138	15	0.695	0.0021	0.6971	Group M	ACC
gag	141	8	0.0027	0.8112	0.8138	(notCPZpts)	DEC
gag	180	139	0.5114	0.0092	0.5206	Group O	ACC
gag	211	139	0.552	0.0101	0.5621	Group O	ACC
gag	220	139	0.5664	0.0049	0.5714	Group O	ACC
gag	315	8	0.0191	0.535	0.5541	(notCPZpts)	DEC
gag	319	53	0.0021	0.5302	0.5322	SubtypesB+D	DEC
gag	332	15	0.0063	0.6182	0.6245	Group M	DEC
gag	336	139	0.6774	0.0055	0.6829	Group O	ACC
gag	339	15	0.5635	0.0059	0.5693	Group M	ACC
gag	361	139	0.7276	0.0046	0.7322	Group O	ACC
gag	362	139	0.6909	0.0075	0.6984	Group O	ACC
gag	372	139	0.0026	0.5799	0.5825	Group O	DEC
gag	382	139	0.0059	0.5182	0.5241	Group O	DEC
gag	410	139	0.5288	0.015	0.5438	Group O	ACC
gag	418	15	0.5855	0.0058	0.5912	Group M	ACC
gag	428	15	0.0003	0.9133	0.9136	Group M	DEC
gag	437	139	0.0042	0.664	0.6682	Group O	DEC
gag	441	8	0.5095	0.0202	0.5297	(notCPZpts)	ACC
gag	464	17	0.5427	0.0007	0.5434	SubtypeC	ACC
gag	468	15	0.0016	0.7119	0.7135	Group M	DEC
gag	476	15	0.0043	0.5283	0.5325	Group M	DEC
gag	480	139	0.0033	0.5846	0.5879	Group O	DEC
gag	484	15	0.6776	0.0013	0.6789	Group M	ACC
gag	499	17	0.6742	0.0004	0.6746	SubtypeC	ACC
gag	500	8	0.013	0.5501	0.5632	(notCPZpts)	DEC
pol	43	15	0.0021	0.6106	0.6127	Group M	DEC
pol	50	139	0.0064	0.5289	0.5353	Group O	DEC
pol	72	8	0.5324	0.0143	0.5467	(notCPZpts)	ACC
pol	91	139	0.0056	0.5363	0.5419	Group O	DEC
pol	95	15	0.0029	0.5099	0.5127	Group M	DEC
pol	133	53	0.6937	0.0003	0.694	SubtypesB+D	ACC
pol	147	8	0.0025	0.7143	0.7167	(notCPZpts)	DEC
pol	194	138	0.0025	0.654	0.6565	SIVgor+P+O	DEC
pol	194	53	0.0005	0.6395	0.64	SubtypesB+D	DEC
pol	215	14	0.5059	0.003	0.5088	Pre M	ACC
pol	349	15	0.0004	0.8274	0.8278	Group M	DEC
pol	349	138	0.0033	0.5494	0.5526	SIVgor+P+O	DEC
pol	356	14	0.003	0.5191	0.5221	Pre M	DEC
pol	406	139	0.0078	0.5986	0.6063	Group O	DEC
pol	406	14	0.0019	0.5861	0.588	Pre M	DEC
pol	432	139	0.6699	0.0022	0.6721	Group O	ACC
pol	450	15	0.0007	0.7611	0.7618	Group M	DEC
pol	464	139	0.7609	0.0007	0.7616	Group O	ACC
pol	512	8	0.0337	0.5221	0.5558	(notCPZpts)	DEC
pol	532	138	0.0049	0.5647	0.5696	SIVgor+P+O	DEC
pol	540	8	0.0044	0.6433	0.6477	(notCPZpts)	DEC
pol	626	139	0.0017	0.7369	0.7386	Group O	DEC
pol	637	14	0.0035	0.531	0.5345	Pre M	DEC
pol	657	139	0.796	0.0023	0.7984	Group O	ACC
pol	761	139	0.6518	0.0042	0.656	Group O	ACC
pol	771	139	0.6221	0.0048	0.6269	Group O	ACC
pol	851	8	0.5551	0.0071	0.5622	(notCPZpts)	ACC
pol	882	15	0.5424	0.0032	0.5457	Group M	ACC
pol	916	53	0.5658	0.0011	0.5669	SubtypesB+D	ACC
pol	926	138	0.0048	0.5306	0.5353	SIVgor+P+O	DEC
pol	926	15	0.0073	0.5098	0.5171	Group M	DEC
pol	955	139	0.0045	0.5092	0.5137	Group O	DEC
pol	985	139	0.6212	0.0056	0.6268	Group O	ACC
pol	1003	15	0.0012	0.5203	0.5215	Group M	DEC
env	20	17	0.0002	0.5971	0.5972	SubtypeC	DEC
env	46	139	0.003	0.7965	0.7995	Group O	DEC
env	51	139	0.7325	0.0029	0.7354	Group O	ACC
env	58	139	0.9209	0.0003	0.9212	Group O	ACC
env	61	139	0.0012	0.8553	0.8565	Group O	DEC
env	61	15	0.0025	0.6358	0.6383	Group M	DEC
env	91	8	0.005	0.6613	0.6663	(notCPZpts)	DEC
env	96	8	0.0202	0.5066	0.5267	(notCPZpts)	DEC
env	97	15	0.0001	0.9533	0.9534	Group M	DEC
env	114	15	0.5842	0.0032	0.5873	Group M	ACC
env	128	8	0.0058	0.6546	0.6604	(notCPZpts)	DEC
env	132	139	0.0084	0.5125	0.5209	Group O	DEC
env	156	9	0.0014	0.5238	0.5252	CPZptt+N+M	DEC
env	164	15	0.672	0.0015	0.6735	Group M	ACC
env	166	15	0.6362	0.0008	0.637	Group M	ACC
env	169	15	0.5513	0.0001	0.5513	Group M	ACC
env	170	139	0.0022	0.6638	0.666	Group O	DEC
env	173	15	0.5864	0.0002	0.5865	Group M	ACC
env	181	139	0.0026	0.6414	0.6441	Group O	DEC
env	183	8	0.5559	0.0004	0.5562	(notCPZpts)	ACC
env	200	15	0.8187	0	0.8187	Group M	ACC
env	202	139	0.6249	0.001	0.6259	Group O	ACC
env	204	8	0.0041	0.5268	0.5309	(notCPZpts)	DEC
env	206	8	0.0201	0.5768	0.5969	(notCPZpts)	DEC
env	211	15	0.5481	0.0034	0.5515	Group M	ACC
env	229	15	0.7537	0.0022	0.7559	Group M	ACC
env	229	8	0.0088	0.7099	0.7187	(notCPZpts)	DEC
env	258	8	0.0097	0.5877	0.5974	(notCPZpts)	DEC
env	270	8	0.6113	0.0145	0.6259	(notCPZpts)	ACC
env	270	139	0.0076	0.5731	0.5806	Group O	DEC
env	271	139	0.0074	0.5437	0.5511	Group O	DEC
env	274	15	0.0003	0.9139	0.9142	Group M	DEC
env	282	15	0.003	0.5341	0.5371	Group M	DEC
env	283	139	0.0057	0.6802	0.6859	Group O	DEC
env	289	139	0.01	0.5237	0.5338	Group O	DEC
env	295	9	0.5529	0.0031	0.556	CPZptt+N+M	ACC
env	301	139	0.7748	0.0016	0.7764	Group O	ACC
env	302	139	0.8597	0.0003	0.86	Group O	ACC
env	303	139	0.9455	0	0.9455	Group O	ACC
env	304	139	0.6369	0.0026	0.6395	Group O	ACC
env	308	139	0.7133	0.0003	0.7136	Group O	ACC
env	316	139	0.5815	0.0084	0.5899	Group O	ACC
env	324	139	0.6931	0.0009	0.694	Group O	ACC
env	328	8	0.6115	0.006	0.6175	(notCPZpts)	ACC
env	342	139	0.0057	0.6386	0.6443	Group O	DEC
env	344	139	0.0016	0.6471	0.6487	Group O	DEC
env	346	139	0.0028	0.6015	0.6043	Group O	DEC
env	349	8	0.6897	0.0016	0.6914	(notCPZpts)	ACC
env	371	139	0.7465	0.0015	0.7479	Group O	ACC
env	374	15	0.0013	0.5105	0.5118	Group M	DEC
env	391	8	0.0147	0.54	0.5547	(notCPZpts)	DEC
env	393	54	0.0002	0.5925	0.5927	SubtypeB	DEC
env	415	138	0.5711	0.0019	0.5731	SIVgor+P+O	ACC
env	428	139	0.5647	0.0099	0.5746	Group O	ACC
env	429	139	0.7294	0.0027	0.7321	Group O	ACC
env	431	139	0.5725	0.0066	0.5791	Group O	ACC
env	446	53	0	0.5524	0.5524	SubtypesB+D	DEC
env	455	15	0.0005	0.8108	0.8112	Group M	DEC
env	457	15	0.006	0.5144	0.5204	Group M	DEC
env	458	15	0.0005	0.8056	0.806	Group M	DEC
env	473	8	0.0066	0.5084	0.5151	(notCPZpts)	DEC
env	482	139	0.8471	0.0015	0.8486	Group O	ACC
env	490	8	0.6128	0.0067	0.6196	(notCPZpts)	ACC
env	518	14	0.5845	0.0014	0.5859	Pre M	ACC
env	536	139	0.516	0.0106	0.5266	Group O	ACC
env	538	139	0.6255	0.0027	0.6282	Group O	ACC
env	540	139	0.8503	0.0016	0.8519	Group O	ACC
env	542	138	0.7052	0.0016	0.7068	SIVgor+P+O	ACC
env	543	15	0.0028	0.5157	0.5185	Group M	DEC
env	545	139	0.8152	0.0009	0.8161	Group O	ACC
env	581	139	0.7884	0.0022	0.7906	Group O	ACC
env	586	139	0.6327	0.0065	0.6392	Group O	ACC
env	588	8	0.5021	0.0203	0.5224	(notCPZpts)	ACC
env	601	138	0.8647	0.0003	0.865	SIVgor+P+O	ACC
env	625	139	0.7719	0.001	0.773	Group O	ACC
env	662	14	0.5667	0.002	0.5686	Pre M	ACC
env	674	15	0.5079	0.0009	0.5088	Group M	ACC
env	683	15	0.5016	0.0051	0.5066	Group M	ACC
env	700	17	0.0006	0.5585	0.5591	SubtypeC	DEC
env	722	138	0.5253	0.006	0.5313	SIVgor+P+O	ACC
env	729	8	0.6036	0.0157	0.6193	(notCPZpts)	ACC
env	740	15	0.0018	0.5008	0.5025	Group M	DEC
env	744	139	0.6375	0.0077	0.6453	Group O	ACC
env	745	139	0.6349	0.0077	0.6426	Group O	ACC
env	747	139	0.544	0.0013	0.5452	Group O	ACC
env	748	139	0.5547	0.0087	0.5635	Group O	ACC
env	750	139	0.0064	0.5005	0.5068	Group O	DEC
env	756	139	0.0042	0.7417	0.7459	Group O	DEC
env	758	139	0.0042	0.5919	0.5961	Group O	DEC
env	772	139	0.0012	0.888	0.8892	Group O	DEC
env	772	15	0.0022	0.5802	0.5824	Group M	DEC
env	774	139	0.004	0.6407	0.6446	Group O	DEC
env	780	9	0.0031	0.5228	0.5259	CPZptt+N+M	DEC
env	790	139	0.0041	0.5758	0.5799	Group O	DEC
env	801	139	0.0018	0.8521	0.854	Group O	DEC
env	805	138	0.0011	0.7225	0.7236	SIVgor+P+O	DEC
env	811	8	0.003	0.6365	0.6395	(notCPZpts)	DEC
env	832	139	0.0011	0.8202	0.8213	Group O	DEC
env	836	138	0.0038	0.5692	0.5729	SIVgor+P+O	DEC
env	837	138	0.0024	0.5004	0.5028	SIVgor+P+O	DEC
env	838	8	0.0046	0.6216	0.6262	(notCPZpts)	DEC
env	854	139	0.6614	0.0041	0.6655	Group O	ACC
env	856	139	0.5122	0.0071	0.5193	Group O	ACC
vif	17	17	0.694	0.0011	0.6951	SubtypeC	ACC
vif	20	139	0.5072	0.002	0.5092	Group O	ACC
vif	34	8	0.0277	0.6109	0.6387	(notCPZpts)	DEC
vif	47	8	0.5657	0.0026	0.5683	(notCPZpts)	ACC
vif	59	167	0.5331	0.0009	0.534	#N/A	ACC
vif	73	138	0.004	0.6352	0.6393	SIVgor+P+O	DEC
vif	122	8	0.5221	0.024	0.5461	(notCPZpts)	ACC
vif	127	139	0.0036	0.6631	0.6667	Group O	DEC
vif	127	8	0.5898	0.0276	0.6174	(notCPZpts)	ACC
vif	128	17	0.0007	0.5602	0.5608	SubtypeC	DEC
vif	130	54	0.0011	0.5777	0.5788	SubtypeB	DEC
vif	134	15	0.5943	0.003	0.5973	Group M	ACC
vif	167	138	0.0044	0.6259	0.6303	SIVgor+P+O	DEC
vif	178	139	0.77	0.0024	0.7724	Group O	ACC
vpr	28	8	0.5045	0.0085	0.513	(notCPZpts)	ACC
vpr	38	8	0.0183	0.5274	0.5458	(notCPZpts)	DEC
vpr	60	15	0.7744	0.0004	0.7748	Group M	ACC
vpr	62	8	0.0013	0.6391	0.6404	(notCPZpts)	DEC
vpr	68	138	0.5001	0.0053	0.5053	SIVgor+P+O	ACC
vpr	77	139	0.0007	0.599	0.5997	Group O	DEC
tat	39	15	0.6494	0.0035	0.6528	Group M	ACC
tat	54	9	0.5268	0.0153	0.5421	CPZptt+N+M	ACC
tat	61	6	0.0161	0.5611	0.5772	CPZpts-1	DEC
tat	69	9	0.6308	0.0131	0.6439	CPZptt+N+M	ACC
tat	81	14	0.5543	0.0042	0.5586	Pre M	ACC
rev	21	53	0.8632	0.0007	0.8639	SubtypesB+D	ACC
rev	32	53	0.0008	0.7054	0.7062	SubtypesB+D	DEC
rev	39	139	0.8004	0.0099	0.8103	Group O	ACC
rev	47	139	0.0235	0.6952	0.7187	Group O	DEC
rev	55	53	0.721	0.0016	0.7226	SubtypesB+D	ACC
rev	55	139	0.697	0.018	0.7149	Group O	ACC
rev	58	54	0.5325	0.0006	0.5331	SubtypeB	ACC
rev	59	139	0.6462	0.0236	0.6698	Group O	ACC
rev	71	139	0.0227	0.7273	0.75	Group O	DEC
rev	71	14	0.0042	0.5937	0.5979	Pre M	DEC
rev	79	139	0.0188	0.5537	0.5725	Group O	DEC
rev	90	139	0.0041	0.82	0.8241	Group O	DEC
rev	92	15	0.0048	0.5083	0.5131	Group M	DEC
rev	97	139	0.0133	0.7642	0.7775	Group O	DEC
rev	98	139	0.008	0.6212	0.6293	Group O	DEC
rev	106	54	0.0013	0.504	0.5053	SubtypeB	DEC
rev	108	139	0.0113	0.7479	0.7592	Group O	DEC
rev	109	139	0.0101	0.5581	0.5682	Group O	DEC
rev	112	139	0.0128	0.5892	0.602	Group O	DEC
rev	112	53	0.0033	0.5016	0.505	SubtypesB+D	DEC
nef	6	138	0.5294	0.0031	0.5325	SIVgor+P+O	ACC
nef	8	15	0.6121	0.0025	0.6146	Group M	ACC
nef	8	139	0.5655	0.0037	0.5692	Group O	ACC
nef	9	15	0.7035	0.0015	0.705	Group M	ACC
nef	12	8	0.0114	0.6836	0.695	(notCPZpts)	DEC
nef	17	8	0.0038	0.6038	0.6076	(notCPZpts)	DEC
nef	20	138	0.0038	0.5293	0.533	SIVgor+P+O	DEC
nef	27	8	0.0018	0.7569	0.7586	(notCPZpts)	DEC
nef	28	138	0.0034	0.6341	0.6375	SIVgor+P+O	DEC
nef	29	8	0.0018	0.9016	0.9033	(notCPZpts)	DEC
nef	30	8	0.0006	0.927	0.9276	(notCPZpts)	DEC
nef	36	138	0.5533	0.0025	0.5558	SIVgor+P+O	ACC
nef	38	138	0.0044	0.5469	0.5513	SIVgor+P+O	DEC
nef	49	139	0.0023	0.5978	0.6001	Group O	DEC
nef	50	139	0.0006	0.8426	0.8432	Group O	DEC
nef	50	8	0.7565	0.0045	0.7611	(notCPZpts)	ACC
nef	52	8	0.0012	0.7316	0.7327	(notCPZpts)	DEC
nef	56	8	0.001	0.8465	0.8475	(notCPZpts)	DEC
nef	63	8	0.6978	0.0021	0.6999	(notCPZpts)	ACC
nef	65	139	0.515	0.0038	0.5187	Group O	ACC
nef	81	8	0.534	0.002	0.536	(notCPZpts)	ACC
nef	129	130	0.5203	0.0004	0.5207	#N/A	ACC
nef	157	15	0.6126	0.0021	0.6147	Group M	ACC
nef	176	8	0.6637	0.003	0.6667	(notCPZpts)	ACC
nef	177	138	0.0044	0.6552	0.6597	SIVgor+P+O	DEC
nef	191	8	0.7522	0.0013	0.7535	(notCPZpts)	ACC
nef	196	138	0.5775	0.0076	0.5851	SIVgor+P+O	ACC
nef	197	138	0.8005	0.0024	0.8029	SIVgor+P+O	ACC
nef	198	8	0.6778	0.01	0.6878	(notCPZpts)	ACC
vpu	2	139	0.5377	0.028	0.5657	Group O	ACC
vpu	2	15	0.5368	0.0162	0.5529	Group M	ACC
vpu	6	8	0.5259	0.0642	0.5901	(notCPZpts)	ACC
vpu	10	16	0.0003	0.6639	0.6642	#N/A	DEC
vpu	18	15	0.0115	0.6685	0.68	Group M	DEC
vpu	23	15	0.0061	0.6944	0.7005	Group M	DEC
vpu	27	8	0.5066	0.0786	0.5852	(notCPZpts)	ACC
vpu	28	15	0.0006	0.9177	0.9183	Group M	DEC
vpu	31	139	0.005	0.6418	0.6468	Group O	DEC
vpu	37	139	0.0051	0.7877	0.7928	Group O	DEC
vpu	37	53	0.0022	0.6502	0.6524	SubtypesB+D	DEC
vpu	38	8	0.0576	0.6186	0.6762	(notCPZpts)	DEC
vpu	40	8	0.5279	0.0062	0.5341	(notCPZpts)	ACC
vpu	43	8	0.7522	0.0227	0.775	(notCPZpts)	ACC
vpu	48	138	0.5333	0.0133	0.5465	SIVgor+P+O	ACC
vpu	50	8	0.0106	0.8541	0.8647	(notCPZpts)	DEC
vpu	60	8	0.0259	0.7747	0.8006	(notCPZpts)	DEC
vpu	63	8	0.0634	0.633	0.6965	(notCPZpts)	DEC
vpu	66	15	0.0079	0.5584	0.5663	Group M	DEC
vpu	78	228	0.5039	0.0285	0.5325	#N/A	ACC
vpu	81	139	0.0134	0.5331	0.5465	Group O	DEC
