# Supplementary material for: Site-Specific Evolutionary Rate Shifts in HIV-1 and SIV
Source: Viruses. 2020 Nov 16;12(11):1312. doi: 10.3390/v12111312 (PMC7696578; doi:10.3390/v12111312)
Supplement: Supplementary file 1 [file viruses-12-01312-s001.zip › File S3.csv]

protein	position	branch	probAcc	probDec	probAll	branch label	rateshift type
gag	12	14	0.6364	0.0007	0.6371	SubtypesB+D	ACC
gag	30	13	0.5636	0.0083	0.5719	Group M	ACC
gag	55	13	0.5344	0.011	0.5454	Group M	ACC
gag	59	407	0.5285	0.0141	0.5426	Group O	ACC
gag	90	15	0.0012	0.6389	0.6402	SubtypeB	DEC
gag	102	7	0.5262	0.0569	0.5831	(notCPZpts)	ACC
gag	107	14	0.0002	0.7766	0.7768	SubtypesB+D	DEC
gag	107	7	0.69	0.0174	0.7074	(notCPZpts)	ACC
gag	112	14	0.0016	0.5797	0.5813	SubtypesB+D	DEC
gag	112	307	0.0013	0.5111	0.5125	SubtypeC	DEC
gag	113	13	0.0033	0.6874	0.6907	Group M	DEC
gag	116	13	0.0004	0.7262	0.7266	Group M	DEC
gag	117	13	0.004	0.5515	0.5555	Group M	DEC
gag	119	15	0.001	0.646	0.647	SubtypeB	DEC
gag	119	7	0.5188	0.0653	0.5841	(notCPZpts)	ACC
gag	134	12	0.0041	0.546	0.55	Pre M	DEC
gag	136	5	0.5172	0.0158	0.5329	#N/A	ACC
gag	138	13	0.6206	0.0084	0.6291	Group M	ACC
gag	141	7	0.0015	0.798	0.7994	(notCPZpts)	DEC
gag	159	13	0.5016	0.0149	0.5165	Group M	ACC
gag	280	15	0.685	0.0002	0.6851	SubtypeB	ACC
gag	315	286	0.5188	0.0004	0.5192	#N/A	ACC
gag	339	311	0.0003	0.5423	0.5426	#N/A	DEC
gag	398	7	0.0349	0.5104	0.5453	(notCPZpts)	DEC
gag	418	13	0.7447	0.0003	0.7449	Group M	ACC
gag	428	13	0.0002	0.9077	0.9079	Group M	DEC
gag	437	13	0.001	0.8895	0.8905	Group M	DEC
gag	437	407	0.0098	0.6276	0.6374	Group O	DEC
gag	454	405	0.5474	0.0084	0.5558	Groups O+P	ACC
gag	460	249	0.0005	0.568	0.5684	#N/A	DEC
gag	460	8	0.5093	0.0036	0.5129	CPZptt+N+M	ACC
gag	468	13	0.0011	0.618	0.6192	Group M	DEC
gag	474	14	0.0002	0.6496	0.6497	SubtypesB+D	DEC
gag	481	7	0.5693	0.0509	0.6202	(notCPZpts)	ACC
gag	483	13	0.5202	0.0094	0.5296	Group M	ACC
gag	487	13	0.6187	0.0044	0.6231	Group M	ACC
pol	12	12	0.5048	0.0063	0.5111	Pre M	ACC
pol	43	13	0.0031	0.6005	0.6036	Group M	DEC
pol	43	7	0.5745	0.0086	0.5831	(notCPZpts)	ACC
pol	50	7	0.5326	0.019	0.5516	(notCPZpts)	ACC
pol	52	14	0.0007	0.5399	0.5405	SubtypesB+D	DEC
pol	55	13	0.6067	0.0006	0.6073	Group M	ACC
pol	95	13	0.0012	0.8505	0.8517	Group M	DEC
pol	133	14	0.6324	0.0007	0.6331	SubtypesB+D	ACC
pol	183	12	0.003	0.6302	0.6333	Pre M	DEC
pol	191	305	0.5275	0.0002	0.5277	#N/A	ACC
pol	194	405	0.0068	0.5041	0.5109	Groups O+P	DEC
pol	195	7	0.0231	0.545	0.5681	(notCPZpts)	DEC
pol	297	407	0.5743	0.0065	0.5808	Group O	ACC
pol	328	14	0.0015	0.6869	0.6885	SubtypesB+D	DEC
pol	349	13	0.0003	0.8715	0.8718	Group M	DEC
pol	406	12	0.0037	0.6266	0.6303	Pre M	DEC
pol	427	13	0.6645	0.0019	0.6663	Group M	ACC
pol	448	14	0.767	0.001	0.768	SubtypesB+D	ACC
pol	477	13	0.0021	0.5603	0.5624	Group M	DEC
pol	626	407	0.0076	0.5246	0.5322	Group O	DEC
pol	637	12	0.0045	0.5602	0.5648	Pre M	DEC
pol	849	14	0.0008	0.6533	0.6541	SubtypesB+D	DEC
pol	851	7	0.5975	0.016	0.6135	(notCPZpts)	ACC
pol	996	13	0.0003	0.6874	0.6877	Group M	DEC
env	4	13	0.6046	0.0003	0.6049	Group M	ACC
env	6	13	0.0061	0.7037	0.7099	Group M	DEC
env	18	13	0.0019	0.7248	0.7266	Group M	DEC
env	22	14	0.0004	0.5797	0.5801	SubtypesB+D	DEC
env	23	13	0.0015	0.817	0.8186	Group M	DEC
env	23	7	0.6668	0.0056	0.6723	(notCPZpts)	ACC
env	51	264	0.9004	0.0001	0.9005	#N/A	ACC
env	51	407	0.5424	0.0183	0.5607	Group O	ACC
env	51	5	0.0124	0.5158	0.5282	#N/A	DEC
env	65	307	0.001	0.54	0.5409	SubtypeC	DEC
env	84	13	0.7035	0.0002	0.7037	Group M	ACC
env	96	7	0.0228	0.6326	0.6553	(notCPZpts)	DEC
env	97	14	0.0003	0.5319	0.5323	SubtypesB+D	DEC
env	128	7	0.0107	0.5396	0.5503	(notCPZpts)	DEC
env	160	14	0.0004	0.6385	0.6389	SubtypesB+D	DEC
env	160	407	0.0145	0.512	0.5265	Group O	DEC
env	161	8	0.0011	0.6102	0.6113	CPZptt+N+M	DEC
env	169	13	0.8744	0.0001	0.8745	Group M	ACC
env	171	13	0.8719	0.0002	0.8721	Group M	ACC
env	172	14	0.6542	0.0006	0.6547	SubtypesB+D	ACC
env	175	13	0.6028	0.0001	0.6029	Group M	ACC
env	176	13	0.6627	0.0002	0.663	Group M	ACC
env	178	13	0.7472	0	0.7472	Group M	ACC
env	180	15	0.5962	0.0006	0.5968	SubtypeB	ACC
env	205	13	0.5955	0.0074	0.6029	Group M	ACC
env	207	407	0.5742	0.0102	0.5844	Group O	ACC
env	234	13	0.5639	0.0064	0.5703	Group M	ACC
env	279	13	0.0003	0.6793	0.6796	Group M	DEC
env	290	407	0.5251	0.0067	0.5319	Group O	ACC
env	293	275	0.5741	0.0002	0.5744	#N/A	ACC
env	302	12	0.0062	0.5416	0.5478	Pre M	DEC
env	306	407	0.5182	0.0044	0.5226	Group O	ACC
env	307	407	0.5964	0.0065	0.603	Group O	ACC
env	308	407	0.7718	0.0012	0.773	Group O	ACC
env	314	407	0.6756	0.0121	0.6877	Group O	ACC
env	314	13	0.6014	0.0011	0.6025	Group M	ACC
env	314	307	0.0008	0.5543	0.555	SubtypeC	DEC
env	318	151	0.6251	0	0.6252	#N/A	ACC
env	319	13	0.0001	0.5861	0.5862	Group M	DEC
env	327	230	0.506	0.0002	0.5061	SubtypeD	ACC
env	329	407	0.6235	0.0047	0.6282	Group O	ACC
env	346	264	0.5186	0.0034	0.522	#N/A	ACC
env	353	407	0.0117	0.5848	0.5965	Group O	DEC
env	363	7	0.0572	0.5044	0.5616	(notCPZpts)	DEC
env	376	407	0.605	0.0194	0.6244	Group O	ACC
env	376	264	0.5427	0.0025	0.5452	#N/A	ACC
env	379	13	0.0009	0.5963	0.5972	Group M	DEC
env	398	15	0.0003	0.5047	0.505	SubtypeB	DEC
env	420	407	0.54	0.0038	0.5438	Group O	ACC
env	429	13	0.5715	0.0065	0.578	Group M	ACC
env	434	13	0.5941	0.0027	0.5968	Group M	ACC
env	434	407	0.5764	0.0173	0.5937	Group O	ACC
env	436	407	0.5571	0.0146	0.5717	Group O	ACC
env	437	13	0.5148	0.0049	0.5197	Group M	ACC
env	460	13	0.0003	0.8562	0.8565	Group M	DEC
env	461	13	0.0059	0.5627	0.5687	Group M	DEC
env	463	13	0.0001	0.9404	0.9405	Group M	DEC
env	463	300	0.586	0.0001	0.5861	#N/A	ACC
env	471	13	0.0001	0.9632	0.9633	Group M	DEC
env	473	12	0.0012	0.6385	0.6398	Pre M	DEC
env	487	407	0.7032	0.0019	0.7051	Group O	ACC
env	495	7	0.6983	0.0133	0.7116	(notCPZpts)	ACC
env	501	13	0.5537	0.0049	0.5586	Group M	ACC
env	520	13	0.7834	0.0004	0.7838	Group M	ACC
env	520	314	0.0001	0.5844	0.5845	#N/A	DEC
env	523	12	0.6845	0.0027	0.6872	Pre M	ACC
env	540	14	0.7104	0.0001	0.7105	SubtypesB+D	ACC
env	586	407	0.5945	0.0036	0.5981	Group O	ACC
env	606	405	0.5863	0.0018	0.5881	Groups O+P	ACC
env	621	407	0.5855	0.0021	0.5876	Group O	ACC
env	634	263	0.8649	0.0001	0.865	#N/A	ACC
env	639	12	0.0024	0.6461	0.6485	Pre M	DEC
env	667	13	0.5167	0.0061	0.5228	Group M	ACC
env	679	13	0.8268	0.0001	0.8268	Group M	ACC
env	681	13	0.5521	0.0063	0.5584	Group M	ACC
env	688	13	0.6355	0.0048	0.6403	Group M	ACC
env	705	12	0.0024	0.623	0.6254	Pre M	DEC
env	730	7	0.5139	0.0539	0.5678	(notCPZpts)	ACC
env	730	275	0.5405	0.0004	0.541	#N/A	ACC
env	731	407	0.0201	0.51	0.5301	Group O	DEC
env	734	7	0.7661	0.0086	0.7747	(notCPZpts)	ACC
env	734	11	0.0008	0.5668	0.5676	#N/A	DEC
env	745	249	0.0002	0.5031	0.5033	#N/A	DEC
env	749	14	0.802	0.0002	0.8022	SubtypesB+D	ACC
env	752	15	0.6162	0.0002	0.6164	SubtypeB	ACC
env	757	14	0.6699	0.0006	0.6705	SubtypesB+D	ACC
env	769	407	0.018	0.51	0.528	Group O	DEC
env	777	407	0.0129	0.6778	0.6907	Group O	DEC
env	777	13	0.0013	0.5197	0.5211	Group M	DEC
env	779	407	0.0181	0.5308	0.5489	Group O	DEC
env	782	11	0.0005	0.5515	0.552	#N/A	DEC
env	785	8	0.0017	0.594	0.5956	CPZptt+N+M	DEC
env	793	13	0.0027	0.7575	0.7602	Group M	DEC
env	794	13	0.0025	0.7766	0.779	Group M	DEC
env	799	13	0.0006	0.9243	0.9249	Group M	DEC
env	800	13	0.0063	0.554	0.5603	Group M	DEC
env	810	14	0.0004	0.6466	0.647	SubtypesB+D	DEC
env	818	7	0.0316	0.633	0.6647	(notCPZpts)	DEC
env	820	13	0.7273	0.0002	0.7275	Group M	ACC
env	834	13	0.6039	0.0071	0.611	Group M	ACC
vif	19	13	0.6162	0.001	0.6172	Group M	ACC
vif	19	263	0.001	0.5519	0.5529	#N/A	DEC
vif	19	307	0.0016	0.5445	0.5462	SubtypeC	DEC
vif	22	13	0.7009	0.0072	0.708	Group M	ACC
vif	34	7	0.0115	0.7957	0.8072	(notCPZpts)	DEC
vif	47	7	0.7257	0.0051	0.7309	(notCPZpts)	ACC
vif	59	13	0.0063	0.554	0.5603	Group M	DEC
vif	63	13	0.7008	0.0004	0.7012	Group M	ACC
vif	63	405	0.5425	0.0068	0.5493	Groups O+P	ACC
vif	77	263	0.7494	0.0011	0.7505	#N/A	ACC
vif	154	160	0.0004	0.5898	0.5902	#N/A	DEC
vif	155	7	0.5299	0.025	0.555	(notCPZpts)	ACC
vif	156	13	0.0021	0.8601	0.8622	Group M	DEC
vif	160	14	0.0009	0.5704	0.5713	SubtypesB+D	DEC
vpr	22	13	0.0024	0.7226	0.7249	Group M	DEC
vpr	28	7	0.5935	0.0652	0.6587	(notCPZpts)	ACC
vpr	89	13	0.5149	0.0103	0.5252	Group M	ACC
vpr	94	311	0.0008	0.6472	0.648	#N/A	DEC
tat	24	13	0.7437	0.0004	0.7441	Group M	ACC
tat	24	409	0.6016	0.0059	0.6075	#N/A	ACC
tat	32	13	0.5608	0.0013	0.5621	Group M	ACC
tat	36	15	0.0008	0.5142	0.515	SubtypeB	DEC
tat	39	13	0.843	0.0003	0.8433	Group M	ACC
tat	54	263	0.6062	0.002	0.6082	#N/A	ACC
tat	61	13	0.6892	0.0027	0.6919	Group M	ACC
tat	61	276	0.0014	0.6621	0.6635	#N/A	DEC
tat	61	5	0.0186	0.6254	0.644	#N/A	DEC
tat	64	5	0.0239	0.5378	0.5617	#N/A	DEC
tat	97	14	0.6223	0.0022	0.6244	SubtypesB+D	ACC
rev	7	13	0.0073	0.5371	0.5443	Group M	DEC
rev	18	13	0.768	0.0039	0.7719	Group M	ACC
rev	21	14	0.7634	0	0.7634	SubtypesB+D	ACC
rev	36	11	0.0065	0.5058	0.5123	#N/A	DEC
rev	39	407	0.6454	0.0082	0.6536	Group O	ACC
rev	51	17	0.5787	0.0003	0.579	#N/A	ACC
rev	54	263	0.0004	0.6848	0.6851	#N/A	DEC
rev	59	407	0.5918	0.0227	0.6145	Group O	ACC
rev	71	12	0.0018	0.6693	0.6712	Pre M	DEC
rev	84	407	0.025	0.5517	0.5766	Group O	DEC
rev	92	13	0.0007	0.8484	0.8491	Group M	DEC
rev	95	13	0.006	0.715	0.721	Group M	DEC
rev	97	13	0.0013	0.5259	0.5272	Group M	DEC
rev	101	13	0.0018	0.8236	0.8254	Group M	DEC
rev	104	14	0.0013	0.5981	0.5995	SubtypesB+D	DEC
rev	105	305	0.6399	0.0004	0.6403	#N/A	ACC
rev	107	14	0.001	0.5439	0.5449	SubtypesB+D	DEC
rev	108	407	0.0132	0.6265	0.6397	Group O	DEC
nef	3	62	0.0003	0.5986	0.5989	#N/A	DEC
nef	4	12	0.0026	0.6054	0.608	Pre M	DEC
nef	11	13	0.6912	0.0013	0.6925	Group M	ACC
nef	12	7	0.0182	0.6432	0.6614	(notCPZpts)	DEC
nef	17	7	0.0026	0.5274	0.53	(notCPZpts)	DEC
nef	18	13	0.0014	0.8342	0.8355	Group M	DEC
nef	29	7	0.0017	0.9046	0.9063	(notCPZpts)	DEC
nef	30	7	0.0002	0.9161	0.9163	(notCPZpts)	DEC
nef	32	13	0.0003	0.5744	0.5747	Group M	DEC
nef	50	7	0.6565	0.0268	0.6833	(notCPZpts)	ACC
nef	50	407	0.0108	0.5341	0.5449	Group O	DEC
nef	54	13	0.5848	0.0114	0.5961	Group M	ACC
nef	56	7	0.0016	0.7831	0.7847	(notCPZpts)	DEC
nef	62	13	0.0002	0.9399	0.9401	Group M	DEC
nef	108	13	0.6309	0.0042	0.6351	Group M	ACC
nef	177	14	0.0006	0.8087	0.8093	SubtypesB+D	DEC
nef	188	8	0.5001	0.0017	0.5019	CPZptt+N+M	ACC
nef	196	407	0.517	0.0088	0.5258	Group O	ACC
nef	197	405	0.5268	0.0026	0.5294	Groups O+P	ACC
nef	198	7	0.657	0.0068	0.6638	(notCPZpts)	ACC
nef	202	62	0.0001	0.6201	0.6202	#N/A	DEC
nef	202	13	0.5862	0.0002	0.5864	Group M	ACC
vpu	10	16	0.0002	0.8556	0.8558	Group M	DEC
vpu	17	16	0.546	0.0168	0.5628	Group M	ACC
vpu	18	16	0.0004	0.7541	0.7545	Group M	DEC
vpu	19	9	0.0043	0.6699	0.6742	(Group O)	DEC
vpu	23	16	0.0046	0.8243	0.8289	Group M	DEC
vpu	25	16	0.0109	0.5117	0.5226	Group M	DEC
vpu	27	16	0.0159	0.5584	0.5744	Group M	DEC
vpu	28	16	0.0001	0.9688	0.9689	Group M	DEC
vpu	29	233	0.5476	0.0008	0.5483	Subtype D	ACC
vpu	31	16	0.0261	0.6704	0.6966	Group M	DEC
vpu	34	15	0.0107	0.5409	0.5517	Pre M	DEC
vpu	36	17	0.0033	0.6138	0.6171	SubtypesB+D	DEC
vpu	39	16	0.03	0.5214	0.5514	Group M	DEC
vpu	65	16	0.0131	0.5277	0.5408	Group M	DEC
vpu	70	16	0.0107	0.6619	0.6726	Group M	DEC
vpu	71	16	0.0028	0.6347	0.6375	Group M	DEC
vpu	72	17	0.0029	0.5661	0.569	SubtypesB+D	DEC
